# Supplementary material for: Enhanced Competitive Immunomagnetic Beads Assay Assisted with PAMAM-Gold Nanoparticles Multi-Enzyme Probes for Detection of Deoxynivalenol
Source: MDPI journal article supplement (doi:10.3390/bios13050536), 2023-05-10
Supplement: s1 [file s1]

# Enhanced Competitive Immunomagnetic Beads Assay Assisted with PAMAM-Gold Nanoparticles Multi-Enzyme Probes for Detection of Deoxynivalenol

Kun Zeng <sup>1</sup>, Jian Yang <sup>1</sup>, Hao Su <sup>1</sup>, Sheng Yang <sup>1</sup>, Xinkai Gu <sup>1</sup>, Zhen Zhang <sup>1</sup> and Hongjun Zhao <sup>2,\*</sup>

<sup>1</sup> School of the Environment and Safety Engineering, Jiangsu University, Jiangsu 212013, China

<sup>2</sup> The Quzhou Affiliated Hospital of Wenzhou Medical University, Quzhou People's Hospital, Quzhou 324000, China

\* Correspondence: zhaohongjun@wmu.edu.cn, Tel.: +86-570-3121509

**Table S1.** Optimization of parameters in magnetic immunoassays based on DON-HRP/AuNPs.

|                            |            | Absorbance at 0 ng/mL of<br>DON | Absorbance at 5 ng/mL of<br>DON | Inhibition rate |
|----------------------------|------------|---------------------------------|---------------------------------|-----------------|
| Volume of IMBs in one test | 20 $\mu$ L | 1.547                           | 0.454                           | 29.35%          |
|                            | 30 $\mu$ L | 1.871                           | 0.445                           | 23.78%          |
|                            | 40 $\mu$ L | 1.934                           | 0.460                           | 18.61%          |
|                            | 1:500      | 1.895                           | 0.358                           | 18.89%          |
| Dilution of antibody       | 1:1000     | 1.758                           | 0.294                           | 16.72%          |
|                            | 1:2000     | 1.354                           | 0.245                           | 18.09%          |
|                            | 1:50       | 2.214                           | 0.567                           | 25.61%          |
| Dilution of DON-HRP/AuNPs  | 1:100      | 1.892                           | 0.345                           | 18.23%          |
|                            | 1:150      | 1.425                           | 0.312                           | 21.89%          |

**Table S2.** Optimization of parameters in magnetic immunoassays based on DON-HRP/AuNPs/PA-MAM.

|                                  |            | Absorbance at 0 ng/mL of<br>DON | Absorbance at 5 ng/mL of<br>DON | Inhibition rate |
|----------------------------------|------------|---------------------------------|---------------------------------|-----------------|
| Volume of IMBs in one test       | 20 $\mu$ L | 1.476                           | 0.428                           | 29.00%          |
|                                  | 30 $\mu$ L | 1.939                           | 0.421                           | 21.69%          |
|                                  | 40 $\mu$ L | 2.010                           | 0.349                           | 17.36%          |
| Dilution of antibody             | 1:500      | 1.966                           | 0.347                           | 17.66%          |
|                                  | 1:1000     | 1.813                           | 0.313                           | 17.29%          |
|                                  | 1:2000     | 1.360                           | 0.222                           | 16.33%          |
| Dilution of DON-HRP/AuNPs/PA-MAM | 1:50       | 2.323                           | 0.323                           | 13.90%          |
|                                  | 1:100      | 1.963                           | 0.276                           | 14.06%          |
|                                  | 1:150      | 1.440                           | 0.268                           | 18.61%          |

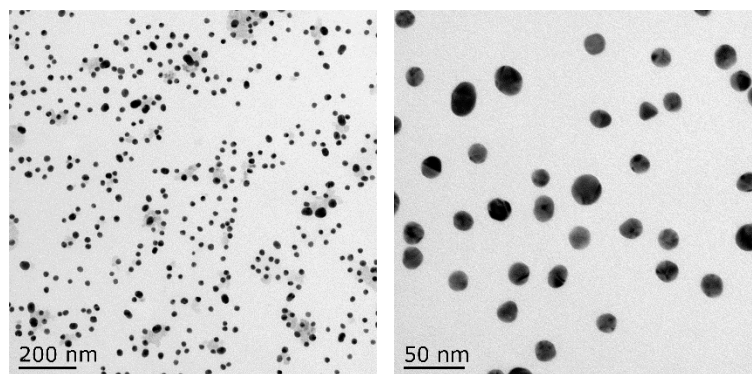

**Figure S1.** TEM images of AuNPs.

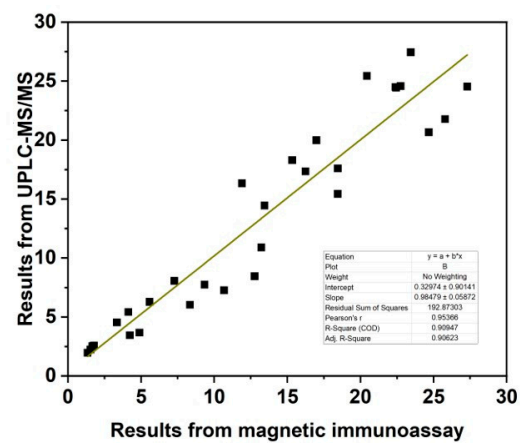

**Figure S2.** Correlation analysis between magnetic immunoassay based on DON-HRP/AuNPs/PA-MAM and UPLC-MS/MS.
